# Supplementary material
Source: publisher figshare collection journal article supplement (https://sage.figshare.com/ndownloader/files/22077921)
Supplement: Supplementary file 1 [file 22077921]

Public Personnel Management


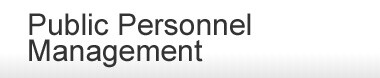

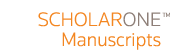


**Challenge Stressors, Work Engagement and Affective Commitment among Chinese Public Servants**

For

Peer

Review

| Journal: | *Public Personnel Management* |
| --- | --- |
| Manuscript ID | PPM-18-0121.R2 |
| Manuscript Type: | Original Article |
| Keywords: | Challenge stressor, work engagement, perceived organizational support, core self-evaluations, moderated moderated (three-way) mediation |
| Abstract: | Drawing on the transactional theory of stress and the person-situation interactionist perspective, we theorize that the indirect effect of challenge stressors on affective commitment through work engagement is moderated by the joint effects of core self-evaluations and perceived organizational support. In a sample of 226 Chinese public servants, we tested a new moderated moderated (three-way) mediation model using structural equation modelling. Our results show that challenge stressors positively influence work engagement, which has a significant positive effect on affective commitment. Moreover, the indirect effect of challenge stressors is maximized when both perceived organizational support and core self-evaluations are high. |
|  | |

https://mc.manuscriptcentral.com/ppm

1 MODERATED MODERATED MEDIATION EFFECT 1

2

3

# 4 Challenge Stressors, Work Engagement and Affective Commitment among

5

# 6 Chinese Public Servants

7

8

9

10

11

12 **Abstract**

13

14 Drawing on the transactional theory of stress and the person-situation interactionist perspective,

15

16

For Peer Review

17 we theorize that the indirect effect of challenge stressors on affective commitment through work

18

19 engagement is moderated by the joint effects of core self-evaluations and perceived

20

21

22 organizational support. In a sample of 226 Chinese public servants, we tested a new moderated

23

24

25 moderated (three-way) mediation model using structural equation modelling. Our results show that challenge

26

27 stressors positively influence work engagement, which has a significant positive effect on

28

29

30 affective commitment. Moreover, the indirect effect of challenge stressors is maximized when

31

32 both perceived organizational support and core self-evaluations are high.

33

34

35

36 **Keywords**

37

38

39 challenge stressor, work engagement, perceived organizational support, core self-evaluations,

40

41

42 moderated moderated (three-way) mediation

43

44

45

46

47

48

49

50

51

52

53

54

55

1 MODERATED MODERATED MEDIATION EFFECT 2

2

3

# 4 Introduction

5

6

7 Due to the increasing complexity of public affairs, work-related stress is now a common problem

8

9 for government departments and their staff. It has become a key topic for theoretical studies,

10

11 however there is little research analyzing the effects of work-related stress

12

， public service motivation as well as the

， job satisfaction of public servants

on the health

13

14 various strategies for relieving their stress (De Simone, Cicotto, Pinna, & Giustiniano, 2016; Liu,

15

16 Yang, & Ju, 2014). Further, the research on work-related stress performed by public

For Peer Review

17

18 administration scholars is insufficient in comparison to the research performed on the same

19

20 topic by business and psychology researchers. Particularly when attempting to define the

21

1. relationship between work-related stress and working outcomes, previous studies have failed to
2. reach a consensus. Similar results are common in other research fields, one example being the

24

25 frequently contradictory findings of studies exploring the relationship between work-related

26

27 stress and job engagement and those that focus on the relationship between physical and mental

28

29 health and attitude toward work (Bakker, Emmerik, & Euwema, 2006; Beehr, Glaser, Canali, &

30

31 Wallwey, 2001). One of the reasons for this situation is that researchers have ignored the

32

1. environmental factors that contribute to work-related stress. In other words, they have failed to
2. deeply explore or classify the sources of work-related stress as well as the mechanisms that

35

36 influence it.

37

38 Some studies have indicated that stress can be divided into two types, namely, good stress

39

40 and bad stress, which lead to different results (Lepine, Podsakoff, & Lepine, 2005). Furthermore,

41

42 job demands (job stress) had been divided into challenge stressors and hindrance stressors.

43

1. Challenge stressors such as workload and job responsibility, are positive forms of stress that
2. promote individual development and goal achievement. Hindrance stressors, such as role

46

47 ambiguity and role conflict, are negative forms of stress that obstruct individual development and

48

49 job satisfaction (Podsakoff, Lepine, & Lepine, 2007). Using this differentiating method,

50

51 Cavanaugh, Boswell, Roehling, & Boudreau (2000) were the first to prove that challenge

52

53 stressors had a positive effect on job satisfaction, while hindrance stressors had a negative effect

54

55 on job satisfaction. Since then, this argument has been confirmed by many researchers, including

1 MODERATED MODERATED MEDIATION EFFECT 3

2

3

4 Crawford, Lepine, & Rich (2010), who discovered through meta-analysis that, when challenge

5

1. stressors and hindrance stressors are not differentiated in the traditional JD-R model,
2. undifferentiated job demands can have a significant negative effect on work engagement. When

8

9 differentiated, challenge stressors can have a significant positive effect on work engagement,

10

11 while hindrance stressors can have a significant negative effect on work engagement.

12

13 Some researchers have tried to use a transactional model to explain why challenge stressors

14

15 have a positive effect and have demonstrated that challenge stressors generate a positive effect

16

For Peer Review

1. on work engagement mainly by triggering positive emotions (Crawford et al., 2010; Webster,
2. Beehr, & Love, 2011). From a person-situation interactional perspective, some scholars believe

19

20 that the effect of challenge stressors on work engagement is influenced by personality traits and

21

22 situational factors. In the present study, the former variable is measured through core

23

24 self-evaluations (CSEs), while the latter is measured using perceived organizational support

25

26 (POS). Many studies have discovered that POS can regulate the effect of challenge stressors on

27

1. work engagement by providing a significant buffering effect (Pomaki, DeLongis, Frey, Short, &
2. Woehrle, 2010; Witt & Carlson, 2006; Zacher & Winter, 2011). In other studies, however, POS

30

31 has also presented a reverse buffering effect (Casper, Harris, Taylor-Bianco, & Wayne, 2011; Jill

32

33 & Margaret, 2001; Stamper & Johlke, 2003; Wallace, 2005). Thus previous studies have been

34

35 unable to generate a consensus.

36

37 Different from incorporating both challenge stressors and hindrance stressors to relieving

38

1. work-related stress in previous studies, the current study focuses on challenge stressors, and
2. specifically on how to harness this positive form of stress. Few previous studies have established

41

42 a relationship between challenge stressors and affective commitment. Instead, most of them have

43

44 investigated the direct effect of challenge stressors on work engagement and the direct effect of

45

46 work engagement on affective commitment(Hu, Schaufeli, & Taris, 2011;Inoue, Kawakami, Tsutsumi, Shimazu, Miyaki, Takahashi ···, & Totsuzaki, 2014). This study has developed a mediating model that

21

22

47

48 analyses the extent to which challenge stressors can have an indirect effect on affective

49

1. commitment through work engagement. More importantly, to counteract the inconsistent
2. buffering effect of POS in previous research, this study has introduced CSE as a secondary

52

53 moderator to explore whether the two-way interaction effect of POS can be regulated by CSE

54

55 (moderated moderation (Hayes, 2013)) to create a three-way interaction effect, which could

1 MODERATED MODERATED MEDIATION EFFECT 4

2

3

4 enhance the stability of the model and the persuasiveness of its conclusions. On the basis of the

5

1. above considerations, we have established a new model. As far as we know, no previous studies
2. have worked with a moderated moderated mediation model (Hayes, 2018) comparable to ours.

8

9 Therefore, this study provides a new opportunity to understand the relationship between affective

10

11 commitment and the challenge stressors and work engagement of public servants.

12

13 In addition, this study provides a basis for government personnel managers to deal more

14

15 effectively with challenge stressors. In our opinion, government personnel managers should offer

16

For Peer Review

1. challenge stressors to public servants to promote positive attitudes and should encourage them to
2. interpret job pressure in a positive light. Organizational support should be provided as needed to

19

20 help public servants to experience work engagement and affective commitment (Hargrove,

21

22 Nelson, & Cooper, 2013).

23

24

# 25 Theory and Hypotheses

26

27

### 28 Challenge-hindrance stressor model

29

30 The design of current study is based on challenge-hindrance stressor model, which sheds light on

31

32 the formation mechanisms of work engagement. Challenge-hindrance stressor model stems from

33

34 job demands-resources model (JD-R model), which posits that every job has characteristics that

35

1. may be categorized into either job demands or job resources (Demerouti, Bakker, Nachreiner, &
2. Schaufeli, 2001). In addition, JD-R model assumes two distinct psychological processes

38

39 (Schaufeli & Bakker, 2004). First, job demands exhaust the employees’ energy stores through an

40

41 energy depletion process of overtaxing and burnout. Second, through the motivational process,

42

43 job resources help employees to deal effectively with high job demands and foster work

44

45 engagement. However, the JD-R model fails to distinguish challenge stressors from hindrance

46

1. stressors. According to previous studies that have used the JD-R model (Schaufeli & Bakker,
2. 2004), job demands do not predict work engagement. Yet this finding on job demands and work

49

50 engagement has been disputed with the advent of the challenge-hindrance stressor model (Min,

51

52 Kim, & Lee, 2015).

53

54

55

56

1 MODERATED MODERATED MEDIATION EFFECT 5

2

3

4

Unlike the overly parsimonious JD-R model, the challenge-hindrance stressor model (Cavanaugh et al.,

2000) differentiates job demands into challenging demands and threatening demands. Challenge stressors are

5

1. stressful demands that have the potential to promote mastery, personal growth, or future gains
2. and that thereby produce desirable outcomes. Hindrance stressors are stressful demands that have

8

9 the potential to thwart personal growth, learning and goal attainment, and that thereby create

10

11 undesirable outcomes. Typical challenge stressors include demands such as heavy workload,

12

13 time pressure and heightened job responsibility, while typical hindrance stressors include

14

15 demands such as role ambiguity, role conflict and organizational politics. Demands that

16

For Peer Review

1. employees tend to interpret as challenges are positively related to work engagement, and
2. demands that employees tend to interpret as hindrances are negatively associated with work

19

20 engagement (Crawford et al., 2010).

21

22

### 23 Transactional theory of stress and person-situation interactionist perspective

24

25

26 The challenge-hindrance framework is rooted in the transactional theory of stress, which

27

1. focuses on the psychological mechanisms of appraisal and coping that make up the stress process
2. in an individual (Pearsall, Ellis, Stein, & Stein, 2009). In the transactional theory of stress

30

31 (Lazarus & Folkman, 1984), psychological stress is defined as ‘a particular relationship between

32

33 the person and the environment that is appraised by the person as taxing or exceeding his or her

34

35 resources and endangering his or her well-being’ (Lazarus & Folkman, 1984, p. 19). This

36

37 definition points to the fact that, although there are objective conditions that can be considered

38

1. stressors, individuals vary in the degree and type of their reaction to identical stressors
2. (Camacho, Hassanein, & Head, 2018). The critical factor in the mediation of each individual’s

41

42 stress response is that person’s interpretation of the situation, or cognitive appraisal. Cognitive

43

44 appraisal as the intervening process between the stressor and the individual’s reaction can be

45

46 understood as ‘the process of categorizing an encounter, and its various facets, with respect to its

47

48 significance for well-being’ (Lazarus & Folkman, 1984, p. 31). Challenge appraisal, one of three

49

1. types of primary cognitive appraisal, focuses on the potential for gain or growth and can be
2. accompanied by pleasurable emotions such as eagerness, excitement and exhilaration. In the

52

53 same vein, challenge stressors, because they tend to be appraised as having the potential to

54

55 promote personal growth or gains, tend to trigger positive emotions (Crawford et al. 2010).

1 MODERATED MODERATED MEDIATION EFFECT 6

2

3

4 Therefore, individuals are more willing to invest themselves in response to challenge stressors.

5

1. As such, the transactional theory of stress offers a suitable framework to suggest the positive
2. relationship between challenge stressors and work engagement.

8

9 The person-situation interactionist model (Tett & Burnett, 2003) posits that the motivations

10

11 for individual behavior are affected by the interaction of individual personality traits and

12

13 situational factors, with respect not only to effect size but also to direction. According to the

14

15 interactionism paradigm, the person and the situation are inextricably interwoven. Namely,

16

1. personal factors and situational factors are not mutually exclusive but rather interact to determine

For Peer e

1. each individual’s behavior (Ruiz-Palomino & Linuesa-Langreo, 2018). As Liao, Yang, Wang,

19

20 Drown, & Shi (2013) suggested, individuals with different personality traits may appraise and

21

22 react to similar situations (e.g. low level of POS) in different ways. Following the interactionist

23

24 model, CSE (a personal factor) could serve as a boundary condition under which POS (a

25

26 situational factor) moderates the effect of challenge stressors on work engagement.

27

28

R

### 29 The mediating role of work engagement on the relationship between challenge stressors and

30

### 31 affective commitment

vi

32

33 Although previous studies have cited various definitions of ‘challenge stressors’, generally

ew

34

35 speaking, current studies tend to evaluate challenge stressors in terms of work overload and job

36

37 responsibility (e.g. Karatepe, Beirami, Bouzari, & Safavi, 2014). This study only chooses ‘job

38

1. responsibility’ to measure challenging stressors on account of the ‘insignificance’ of the relationship between
2. work overload and work engagement in a previous meta-analysis (Cole, Walter, Bedeian, &

41

42 O’Boyle, 2012). In addition to this reason, one study has indicated that workload can be

43

44 appraised primarily as either a challenge or a hindrance, but job responsibility tends to be seen

45

46 only as a challenge (Webster et al., 2011). As a matter of fact, some researchers evaluated

47

48 challenge stressors from a one-dimensional perspective according to their research needs (e.g.

49

1. Lin & Ling , 2018; Pearsall, et al., 2009; Widmer et al., 2012). Therefore, it appeared reasonable
2. for this study to evaluate challenge stressors in terms of job responsibility

52

53 Job responsibility means the amount of responsibility an employee has on the job. It is

54

55 thought to promote learning and development due to its challenging character and has been

56

1 MODERATED MODERATED MEDIATION EFFECT 7

2

3

4 identified as a motivational factor in work engagement (Karatepe et al., 2014). Engagement is

5

1. defined as a positive, fulfilling, work-related state of mind, characterized by vigor, dedication
2. and absorption (Schaufeli, Salanova, González-Romá, & Bakker, 2002). A positive challenge

8

9 can stimulate employees to dedicate time and energy to work, thus increasing work engagement

10

11 (Macey & Schneider, 2008). Therefore, challenge stressors have a significant positive effect on

12

13 work engagement. Employees with a high level of job responsibility are likely to feel that they

14

15 can successfully meet this demand by working hard. By doing so, they expect to experience a

16

For Peer Review

1. sense of personal accomplishment and to receive formal recognition (Crawford et al., 2010).
2. Meta-analyses (Crawford et al., 2010) and many previous studies (Inoue, Kawakami, Tsuno,

19

20 Shimazu, Tomioka, & Nakanishi, 2013; Inoue et al., 2014; Karatepe et al., 2014; Mauno, Kinnunen, & Ruokolainen,

23

24 2007) have shown this to be the case.

25

26 Work engagement triggers many positive results, among them affective commitment.

27

1. Affective commitment refers to an employee’s emotional attachment to, identification with, and
2. involvement in, an organization (Allen & Meyer, 1990). Work engagement and affective

30

31 commitment have a very strong relationship (Hallberg & Schaufeli, 2006). When performing

32

33 duties, people who are dedicated to their work (i.e. who experience high levels of work

34

35 engagement) will bring a strong emotional commitment to the organization’s development

36

37 opportunities and resources (Hakanen, Bakker, & Schaufeli, 2006; Karatepe & Aga, 2012). In

38

1. other words, work engagement will increase affective commitment, as has been confirmed in
2. many previous studies including meta-analyses (Brunetto, Teo, Shacklock, & Farr-Wharton,

41

42 2012; Christian, Garza, & Slaughter, 2011; Cole et al., 2012; Hakanen et al., 2006; Hakanen,

43

44 Schaufeli, & Ahola, 2008; Hu et al., 2011; Jung & Yoon, 2016; Karatepe, 2011; Karatepe & Aga, 2012; Karatepe et al., 2014; Scrima, Lorito, Parry, & Falgares, 2014).

48 Although previous studies have not fully explored the topic, the relationship between

49

1. challenge stressors and affective commitment has attracted the attention of some researchers
2. such as Allen & Meyer (1990), who suggested that job challenge is an antecedent to affective

52

53 commitment. As described above, challenge stressors are seen as a factor that promotes personal

54

55 service and personal development, thus generating positive emotion and increasing career

1 MODERATED MODERATED MEDIATION EFFECT 8

2

3

4 affective commitment (Podsakoff et al., 2007). When endowed with higher positions and more

5

1. responsibility, employees tend to dedicate more time and energy to coping with challenge
2. stressors (Crawford et al., 2010). When such passion yields personal achievement, employees

8

9 show higher levels of engagement at work, further enhancing their affective commitment to the

10

11 organization (Karatepe et al., 2014). Recent meta-analyses (Podsakoff et al., 2007) and

12

13 individual studies (González-Morales & Neves, 2015) have confirmed that challenge stressors

14

15 increase affective commitment. Considering the above three aspects, we propose the following

16

For Peer Review

17 hypothesis:

18

19 **Hypothesis 1(H1)**: Work engagement mediates the relationship between challenge stressor

20

21 and affective commitment such that challenge stressors positively influence work

22

23 engagement and work engagement positively affects affective commitment.

24

25

### 26 The joint moderating effects of POS and CSE

27

28 POS reflects “global beliefs concerning the extent to which the organization values their

29

30 contributions and cares about well-being” (Rhoades & Eisenberger, 2002, p. 698). Studies have

31

32 shown that employees with high POS have positive expectations going into organizational

33

34 assessments of their contributions and shortcomings. They seem less afraid of job responsibility

35

1. and usually show higher levels of work engagement (Rich, Lepine, & Crawford, 2010). In
2. contrast, employees with low POS usually try to protect themselves by reducing work

38

39 engagement because they fear job responsibility. According to the norm of reciprocity, if a

40

41 person is supported by an organization, he or she will pay back the organization by increasing his

42

43 or her work engagement. In meta-analyses of social support (Christian et al., 2011; Nahrgang,

44

45 Morgeson, & Hofmann, 2011) and co-worker support (Cole et al., 2012), both social support and

46

1. co-worker support can increase work engagement. Thus, high levels of POS will make
2. employees believe that the organization is on their side, which will evoke a feeling of trust,

49

50 organizational identification and long-term obligation, inspiring employees to make greater

51

52 efforts to achieve not only personal but also organizational goals (Witt & Carlson, 2006).

53

54 Hence we have reason to think that high levels of POS will have a positive moderating effect

55

56 on the impact of challenge stressors on work engagement. In fact, POS has been shown to have

1 MODERATED MODERATED MEDIATION EFFECT 9

2

3

4 such an effect in related studies; for example, POS positively moderates the effect of

5

1. family-work conflict on job performance (Witt & Carlson, 2006), the effect of workload on
2. turnover intention (Pomaki et al., 2010), and the effect of emotional dissonance on job

8

9 satisfaction (Abraham, 1998). When the outcome variable was work engagement, POS positively

10

11 moderated the effect of strain (Zacher & Winter, 2011) and job demands (Taipale, Selander,

12

13 Anttila, & Nätti, 2011) on work engagement. Yet other studies have found that the moderating

14

effect of POS is not always shown as predicted, which means the reverse buffering effect; that is,

15

16

1. POS positively moderates the positive effect of job demands on work-family conflict (Wallace,

F

1. 2005), positively moderates the positive effect of role conflict on emotional exhaustion (Kickul

r

o

19

20

& Posig, 2001), positively moderates the positive effect of family-work conflict on continuance

21

Peer Review

22

organizational commitment (Casper et al., 2011), and negatively moderates the negative effect of

23

24 role conflict on job satisfaction (Stamper & Johlke, 2003).

25

26 In analyzing why the moderating effects of POS are thus inconsistent, some researchers have

27

1. argued that there may be other critical moderators (Stetz, Stetz, & Bliese, 2006). This suggestion
2. served as crucial inspiration for the analysis in this study. We have therefore introduced a

30

31 personal moderator—the CSE—using a person-situation interactional perspective to explain the

32

33 inconsistent moderating effects of the situational moderator—POS—as a way of making the

34

35 model more stable. According to Judge, Erez, Bono, & Thoresen (2003), the CSE is a

36

37 multidimensional, higher-order construct consisting of four traits: (1) self-esteem, (2) generalized

38

1. self-efficacy, (3) emotional stability and (4) locus of control. People with high CSE scores have
2. higher adaptability, self-efficacy and self-confidence; they usually have a rich store of resources

41

42 and are good at executing and understanding job requirements (Rich et al., 2010). Many studies

43

44 have focused on the moderating effect of CSE on POS, as evidenced by the two-way interactions

45

46 between social support and locus of control (Voils, Steffens, Flint, & Bosworth, 2005) and

47

48 between social support and self-esteem (Kong, Zhao, & You, 2013). Based on this, some

49

1. researchers have conducted further studies to validate the three-way interactions between
2. ostracism × POS × self-esteem (Teng & Chen, 2012), job challenge × POS × locus of control

52

53 (Noor, 1995), stressors × POS × self-efficacy (Stetz et al., 2006) and job

54

55 satisfaction × POS × self-efficacy (Chen & Scannapieco, 2010). Some researchers have validated

1 MODERATED MODERATED MEDIATION EFFECT 10

2

3

4 the interaction effect between POS and CSE directly (Selvarajan, Singh, & Cloninger, 2016).

5

1. The above studies provide a theoretical basis for introducing CSE into a POS moderating model.
2. For convenience, this study considers the four dimensions of the CSE as a whole to further

8

9 analyze its interaction effect on POS. When individuals with high scores on the CSE components

10

11 (e.g. self-efficacy) feel that they are receiving organizational support, they are likely to view this

12

13 support as a positive interaction (Stetz et al., 2006). Therefore, POS augments the positive effects

14

15 of challenge stressors on work engagement. By contrast, when individuals with low CSE

16

For Peer Review

1. component scores experience organizational support, they are likely to view this support as
2. pressure. In this case, POS will weaken the relationship between challenge stressors and work

19

20 engagement, causing CSE to decrease the two-way interaction effect of POS on the relationship

21

22 between challenge stressors and work engagement. Based on the above analysis, we have

23

24 therefore proposed the following hypothesis:

25

26 **Hypothesis 2(H2):** There is a three-way interaction between challenge stressors, POS and

27

28 CSE in predicting work engagement. Specifically, for high-CSE individuals, POS

29

30 strengthens the relationship between challenge stressors and work engagement, whereas for

31

32 low-CSE individuals, POS weakens the relationship between challenge stressors and work

33

34 engagement.

35

36

### 37 Moderated mediation and moderated moderated mediation

38

39 The relationship between challenge stressors and work engagement can be analyzed in relation to

40

41 both two-way interactions and three-way interactions. In this study, after including affective

42

43 commitment as the final outcome variable, we have established an integrated model that

44

45 combines the mediation and moderation models. Specifically, we have analyzed moderated

46

1. mediation by combining two-way interaction and mediation. We have also analyzed moderated
2. moderated mediation by combining three-way interaction and mediation. Moderated mediation

49

50 means that POS strengthens the indirect effect of challenge stressors, while moderated

51

52 moderated mediation indicates that the moderated mediation effect is stronger for public servants

53

54 with high CSE. In addition, this study predicts that the indirect effect will be maximized when

55

56 both POS and CSE are high. Based on the above analysis, we have proposed the following

1 MODERATED MODERATED MEDIATION EFFECT 11

2

3

4 hypothesis:

5

6 **Hypothesis 3(H3):** The positive indirect effect of challenge stressors on affective

7

8 commitment through work engagement is moderated by POS. In particular, the moderation of

9

10 the indirect effect of challenge stressors by POS is stronger in individuals with higher CSE.

11

12 Figure 1 shows our conceptual model, in which all variables are latent constructs. The model

13

14 suggests that the indirect effect of challenge stressors on affective commitment via work

15

16 engagement is jointly moderated by POS and CSE.

17

18

19

20

21

22

23

24

25

26

27

28

29

30

31

32

33

34 **Figure 1. The first-stage moderated moderated mediation model**

35

36

37

# 38 Research Background

39

40

41 The proportion of Chinese public servants among the total population, estimated at 0.55%, is

42

43 smaller than that of many other nations (Liu, Tang, & Yang, 2015). Compared with Western

44

45 public servants, Chinese public servants face more complicated work assignments at more junior

46

47 stages of their careers. For instance, Tax Bureau officials may be responsible not only for

48

49 poverty alleviation but also for environmental protection. As all of these tasks are required of

50

1. them by law, officials usually experience high levels of work-related stress. Converting this
2. pressure into motivation is a relatively tough problem. In the academic arena, although public

53

54 management researchers recognized the importance of studying stress several decades ago

55

1 MODERATED MODERATED MEDIATION EFFECT 12

2

3

4 (Simon & Nice, 1997; West & West, 1989) and accordingly have conducted many

5

1. experience-based research projects, this issue has not received enough attention, and further
2. study is required (Liu, et al., 2014). There has still been no exhaustive study on work-related

8

9 stress. In China, hindrance stressors are an obvious negative factor, though their existence has

10

11 been denied by senior government officials several times. Challenge stressors, meanwhile,

12

13 remain a mystery—there is still no definite answer as to how they affect the behavior of public

14

15 servants. Although research in other fields has shown that challenge stressors have a complicated

16

For Peer Review

1. effect on the outcome variable, as outcomes are influenced by many factors, the question of
2. whether such complicated effects are experienced by public servants in China remains to be

19

20 answered.

21

22

23 **Method**

24

25

### 26 Participants

27

28

29 In 2016, the Standing Committee of the National People's Congress authorized the China State Council to carry out a pilot

30

31 project on the parallel policy governing public servants’ positions and job grades in Shandong

32

1. Province, Hubei Province, and Sichuan Province. The aim of this project was to generate
2. enthusiasm among public servants and to eliminate the negative effects caused by high levels of

35

36 work-related stress and impediments to promotion. To enhance the real-time performance and

37

38 specificity of the present study, we chose Shandong Province, one of the pilot areas, for this

39

40 investigation. The researchers distributed questionnaires in three provincial cities, each of which had

41

42 undertaken a reorganization of its public servants relatively early: J city, T city and D city. These

43

1. cities are ranked as having high, moderate and low levels of social and economic development,
2. respectively. A total of 270 questionnaires were distributed to public servants in the three cities

46

47 and 240 questionnaires were returned (response rate = 88%). Two hundred twenty-six

48

49 questionnaires turned out to be usable. Among the participants, 55.8 per cent were female; the

50

51 average age was 31.46 years (SD = 4.57); and the average job tenure was 5.33 years (SD = 2.48).

52

53

54 ***Measurement***

1 MODERATED MODERATED MEDIATION EFFECT 13

2

3

4 Responses to all the questionnaire items were scored on a seven-point Likert scale ranging from

5

1. 1 = strongly disagree to 7 = strongly agree.
2. *Challenge stressors.* We adopted four items from Karatepe et al. (2014) to measure public

8

9 servants’ challenge stressors, as manifested in terms of job responsibility. One representative

10

11 item was ‘I feel a very high degree of personal responsibility for the work I do in this job’. The

12

13 Cronbach’s alpha estimate was 0.88.

14

15 *POS.* Six items were selected from Eisenberger, Armeli, Rexwinkel, Lynch, & Rhoades

16

For Peer Review

1. (2001) to assess POS. One sample item was ‘This organization is willing to help me if I need a
2. special favor’. The Cronbach’s alpha for this scale was 0.96.

19

20 *CSE.* We used the twelve-item CSES (Core Self-Evaluations Scale: Judge et al., 2003) to

21

22 assess the positive self-concept (CSE) of each public servant. Judge et al. (2003) have suggested

23

24 that CSES items may indicate a unidimensional factor, given that the more parsimonious

25

26 single-factor model does not differ significantly from the four-factor model. An item from this

27

28 scale is ‘I am capable of coping with most of my problems’. The Cronbach’s alpha for the CSES

29 was 0.98.

30

31 *Work engagement.* Work engagement was assessed using the shortened version of the

32

33 Utrecht Work Engagement Scale (Schaufeli, Bakker, & Salanova, 2006). This scale consisted of

34

35 nine items, including: ‘At my work, I feel bursting with energy’. The Cronbach’s alpha was 0.97.

36

37 *Affective commitment.* Eight items taken from Allen & Meyer (1990) were used to measure

38

1. affective commitment. The two other commitment types (continuance and normative) were
2. excluded from the analysis because they were irrelevant to the reciprocity norm (Marques,

41

42 Chambel, & Pinto, 2015). A sample item was ‘I would be very happy to spend the rest of my

43

44 career with this organization’. The Cronbach’s alpha for this eight-item scale was 0.97.

45

46 *Control variables.* Following Van Dyne and Pierce (2004), we controlled for the

47

48 demographics of gender, age and job tenure of the participants in all analyses.

49

50

# 51 Analysis and Results

52

53 The data were examined to ensure that the assumptions of multivariate normality were met. The

54

55 testing results show that both multivariate skewness (*p* = .19) and kurtosis (*p* = .26) were

1 MODERATED MODERATED MEDIATION EFFECT 14

2

3

4 insignificant, implying that there was no violation of the multivariate normality assumption.

5

1. Multivariate normally distributed data mean that each variable in the data has a univariate normal
2. distribution and each pair of variables has a bivariate normal distribution (Wang & Wang, 2012).

8

9

### 10 Descriptive statistics

11

12

13 Table 1 presents the means, standard deviations and correlations. As expected, challenge

14

15 stressors were positively correlated with work engagement (*r* = .59, *p* < .01), POS (*r* = .57,

16

For Peer Review

1. *p* < .01), CSE (*r* = .48, *p* < .01) and affective commitment (*r* = .41, *p* < .01). Work engagement
2. was positively correlated with affective commitment (*r* = .74, *p* < .01).

19

20

21

22 **Table 1: Descriptive statistics and correlations**

23

24

25 Variable Mean SD 1 2 3 4 5 6 7

26

| Gender | 1.56 | .49 |  |  |  |  | | | |
| --- | --- | --- | --- | --- | --- | --- | --- | --- | --- |
| Age | 31.46 | 4.57 | −.03 |  |  |
| Tenure | 5.33 | 2.48 | .02 | .71** |  |
| CS | 4.22 | 1.29 | .06 | .09 | .09 |
| WE | 3.85 | 1.67 | −.01 | .19** | .21** | .59** |  |  |  |
| POS | 3.89 | 1.52 | −.07 | .16* | .16* | .57** | .81** |  |  |
| CSE | 3.77 | 1.66 | −.11 | .14* | .14* | .48** | .67** | .83** |  |
| AC | 3.41 | 1.64 | .08 | .18** | .12 | .41** | .74** | .63** | .46** |

27

28

29

30

31

32

33

34

35

36

37

38

39

40

41

42 *Note*: *N*=226; SD = standard deviation; Gender: male=1, female=2; CS = challenge stressor; WE

43

44 = work engagement; POS = perceived organizational support; CSE = core self-evaluations; AC =

45 affective commitment.

46

47

### 48 Confirmatory factor analysis

49

50

51 We conducted a confirmatory factor analysis using Mplus 7.4, and compared a four-factor model

52

1. (combining POS and CSE) with a five-factor model because the correlation between POS and
2. CSE was relatively high. The five-factor measurement model had a better goodness of fit

1 MODERATED MODERATED MEDIATION EFFECT 15

2

3

4 (χ2 = 1,182.58, degree of freedom (*df* ) = 692, *p* < .001; root mean square error of approximation

5

1. (RMSEA) = 0.05; comparative fit index (CFI) = 0.96; Tucker-Lewis index (TLI) = 0.96; and
2. standardised root mean square residual (SRMR) = 0.03) than the four-factor model

8

9 (χ2 = 1,865.03, *df* = 696, *p* < .001; RMSEA = 0.09; CFI = 0.91; TLI = 0.90; SRMR = 0.06). The

10

11 difference between the two models was statistically significant (*Δ*χ2 = 682.45, *Δdf* = 4; *p* < .001),

12

13 indicating that POS and CSE were distinctive constructs. All the composite reliabilities were

14

15 greater than 0.80 and the average variance extracted scores were above 0.60. The correlation

16

For Peer Review

1. coefficients among the constructs were less than 0.9, suggesting that discriminant validity was
2. satisfied (Kline, 2016). Furthermore, the average variance extracted estimates from any two

19

20 constructs were higher than their squared interconstruct correlation estimates, thus providing

21

22 clear evidence of discriminant validity (Fornell & Larcker, 1981).

23

24

### 25 Common method bias

26

27

1. With regard to our research design, our self-reported data were collected from a single source at
2. one point in time, so common method bias (CMB) may be a concern (Podsakoff, MacKenzie,

30

31 Lee, & Podsakoff, 2003). Although CMB cannot inflate (but does deflate) interaction effect

32

33 (Podsakoff, MacKenzie, & Podsakoff, 2012), which is the central issue of this research, we

34

35 evaluated whether CMB might be a threat to the underlying data. We employed two statistical

36

37 post-hoc techniques to assess whether variance in our data could be attributed to a single factor.

38

1. First, we conducted a confirmatory factor analysis to test model fit difference between the
2. one-factor model and a multifactor model (Craighead, Ketchen, Dunn, & Hult, 2011). The

41

42 one-factor model (χ2 = 5,829.22, *df* = 702, *p* < .001) fit significantly worse than the multifactor

43

44 model (χ2 = 1,182.58, *df* = 692, *p* < .001), implying that CMB does not pose a serious threat (*Δ*χ2

45

46 =4,646.64, *Δdf* = 10, *p* < .001). Second, we ran a confirmatory factor analysis controlling for the

47

48 effects of a single unmeasured latent method factor (Podsakoff et al., 2003), allowing all

49

1. indicators in the measurement model to load on an unmeasured method factor as well as their
2. respective factors. The common latent factor accounted for 12% of the total variance, which is

52

53 well below the 25% threshold (Williams, Cote, & Buckley, 1989). Thus CMB is not a problem in

54

55 the present case.

1 MODERATED MODERATED MEDIATION EFFECT 16

2

3

### 4 Indirect effect of challenge stressors

5

6 The proposed mediation model fit the data well

(χ2 = 408.11, *df* = 243, *p* < .001; RMSEA = 0.05;

7

8 CFI = 0.97; TLI = 0.97; SRMR = 0.03). Challenge stressors were significantly and positively

9

10 related to work engagement (*a* = 0.74, *p* < .001). Work engagement, in turn, had significant and

11

1. positive effects on affective commitment (*b* = 0.77, *p* < .001). We constructed a 99%
2. bias-corrected bootstrap confidence interval for the indirect effect (*ab* = 0.57), based on 10,000

14

15 bootstrap samples. As this confidence interval (0.39–0.81) does not contain and is entirely above

For Peer Review

16

17 zero, the indirect effect is significant and positive (Hayes, 2013). Sobel test results also indicate

18

19 that the standardized indirect effect is significant (*ab* = 0.57, *p* < .001). Thus Hypothesis 1 is

20

21 supported.

22

23

### 24 Moderated moderation (three-way interaction)

25

26 Klein & Moosbrugger (2000) developed the latent moderated structural equations (LMS)

27

28 approach to estimate latent variable interactions; this was implemented in Mplus. Unlike other

29

30 traditional product indicator approaches (Marsh, Wen, & Hau, 2004), “LMS uses the raw data of

31

32 indicator variables directly for estimation, and *does not require the forming of any products of*

33

34 *indicator variables*” (Klein & Moosbrugger, 2000, p. 467). Of all methods, ‘the LMS method

35

1. may be the most precise because it estimates the degree of non-normality’ (Kline, 2016, p. 443).
2. The moderated moderation model was tested using Mplus. The results of the moderated

38

39 moderation analysis (Table 2) show that both the two-way interaction effect (challenge

40

41 stressor*POS, *β* = 0.23, *p* < .01) and the three-way interaction effect (challenge

42

43 stressor × POS × CSE, *β* = 0.12, *p* < .01) were significant. We probed a three-way interaction to

44

45 identify whether POS moderated the effect of challenge stressors on work engagement,

46

1. conditional on the specific values of CSE. This conditional moderation of challenge stressors by
2. POS estimated the conditional effect of the challenge stressor*POS interaction at a given value

49

50 of CSE. When CSE was equal to two standard deviations below the mean (*β* = −0.17, *p* = .204)

51

52 or equal to one standard deviation below the mean (*β* = .03, *p* = .723), the conditional moderation

53

54 of challenge stressors by POS was insignificant. By contrast, when CSE was equal to the mean

55

56 (*β* = 0.23, *p* < .01), equal to one standard deviation above the mean (*β* = 0.43, *p* < .001), or equal

1 MODERATED MODERATED MEDIATION EFFECT 17

2

3

4 to two standard deviations above the mean (*β* = 0.63, *p* < .001), the conditional moderation of

5

1. challenge stressors by POS was positively significant. Our findings also revealed that the
2. conditional effect of the challenge stressor*POS interaction became larger as CSE increased.

8

9 Since the moderating effect of POS is insignificant when CSE is low, Hypothesis 2 is partially

10

11 supported.

12

13

14

## 15 Table 2. Results of moderated moderation

16

17 Variables *Estimate S.E. T value P value*

18

19 Gender .006

.133

.038

.017

.133

20

21 Age -.020

22

23 Tenure .102

24

25 CS .006

26

27 POS -.020

28

29 CSE .102

30

31 CS*POS .146

32

33 CS*CSE .794

34

.093

.123

.038

.017

eeww

.045

-1.200

.230

.964

2.722

.006

.045

.964

-1.200

.230

2.722

.006

1.195

vi

.232

8.503

.000

35 POS*CSE -.137 .072 -1.907 .057

36 CS*POS*CSE .229 .077 2.970 .003

37

38 Conditional moderation of challenge stressors by POS

39

40 values of CSE *Estimate S.E. T value P value*

41

42 mean-2SD -.170

.204

.134

43

44

| mean-1SD | .030 | .084 | .354 | .723 |
| --- | --- | --- | --- | --- |
|  |  |  |  |  |
| mean | .229 | .077 | 2.970 | .003 |
|  |  |  |  |  |
| Mean + 1SD | .428 | .121 | 3.554 | .000 |
|  |  |  |  |  |
| Mean + 2SD | .628 | .181 | 3.466 | .001 |
|  |  |  |  |  |

45

46

47

48

49

50

51

-1.270

1. *Note*: *N* = 226; S.E. = standard error; Gender: male=1, female=2; CS = challenge stressor; POS =
2. perceived organizational support; CSE = core self-evaluations; SD = standard deviation.

54

55

1 MODERATED MODERATED MEDIATION EFFECT 18

2

3

### 4 Moderated mediation and moderated moderated mediation

5

6 Before our moderated moderated mediation analysis, we tested the moderated mediation model.

7

8 A test that determined the statistical significance of the index of moderated mediation served as a

9

10 formal test of moderated mediation (Hayes, 2015). The results indicated that the index of

11

1. moderated mediation was positive and significant (index = 0.135, *p* < .001), implying that the
2. indirect effect of challenge stressors on affective commitment through work engagement was

14

15 positively moderated by POS. Following Cheung & Lau (2017), we used a three-step procedure

For Peer Review

16

17 to test moderated moderated mediation in the LMS approach using Mplus. In Step 1, the model

18

19 was estimated without the interaction terms (baseline model). As the baseline model fitted the

20

21 data well (χ2 = 1,186.67, *df* = 694, *p* < .001; RMSEA = 0.05; CFI = 0.96; TLI = 0.96;

22

1. SRMR = 0.03) and all the factor loadings were significant, we were able to proceed to the next
2. step. In Step 2, the model was estimated with latent interaction terms (Figure 1). Table 3 shows

25

26 the results of the moderated moderated mediation analysis. As in moderated mediation, an

27

28 inferential test for the index of moderated moderated mediation can be used as a formal test of

29

30 moderated moderated mediation (Hayes, 2018). The index of moderated moderated mediation

31

32 (*a7b* in Table 3) was positive and significant (*a7b* = 0.096, *p* < .01), leading to the conclusion that

33

1. the moderation of the indirect effect by POS is positively moderated by CSE. This moderated
2. moderated mediation effect is still significant after controlling for covariates (gender, age and

36

37 tenure). In Step 3, we can probe this moderation of moderated mediation by choosing specific

38

39 values of CSE, using the index of conditional moderated mediation (in Table 3). The results

40

41 show that when CSE was equal to the mean minus two standard deviations (index = −0.137,

42

43 *p* = .191) or when it was equal to the mean minus one standard deviation (index = 0.022,

44

1. *p* = .732), the moderation of the indirect effect of challenge stressor by POS was insignificant.
2. When CSE was equal to the mean (index = 0.182, *p* < .01), equal to the mean plus one standard

47

48 deviation (index = 0.341, *p* < .01) or equal to the mean plus two standard deviations

49

50 (index = 0.501, *p* < .01), the moderated mediation effect was positive and significant. Thus

51

52 Hypothesis 3 is supported. In Figure 2, we plotted the relationship between POS and the indirect

53

54 effect of challenge stressor at three levels of CSE. The slope of each line corresponds to the

55

56 respective index of conditional moderated mediation in Table 3.

1 MODERATED MODERATED MEDIATION EFFECT 19

2

3

4

5

6

7

8

9

10

11

12

13

14

15

16

For Peer Review

17

18

19

20

21

22

23

24

25

26

## 27 Figure 2. A visual depiction of the indirect effect of challenge stressors on affective

28

29

## 30 commitment via work engagement as a function of POS and CSE

31

32

33

34

## 35 Table 3: Results of moderated moderated mediation

36

37 Mediator variable model: DV = work engagement

38

39

| Variables | *Estimate* | *S.E.* | *T value* | *P value* |
| --- | --- | --- | --- | --- |
| Gender | .003 | .133 | .021 | .983 |
| Age | -.021 | .017 | -1.231 | .218 |
| Tenure | .103 | .038 | 2.750 | .006 |
| CS | .144 | .122 | 1.174 | .240 |
| POS | .801 | .093 | 8.611 | .000 |
| CSE | -.145 | .072 | -2.030 | .042 |
| CS*POS | .233 | .077 | 3.034 | .002 |
| CS*CSE | .007 | .073 | .101 | .919 |

40

41

42

43

44

45

46

47

48

49

50

51

52

53

54

55

7 Dependent variable model: DV = affective commitment

8

| 1 MODERATED MODERATED MEDIATION EFFECT 20  2  3 | | | | | |
| --- | --- | --- | --- | --- | --- |
| 4 | POS*CSE | .027 | .045 | .588 | .556 |
| 5 |  |  |  |  |  |
| 6 | CS*POS*CSE(*a7*) | .123 | .042 | 2.974 | .003 |

9 Gender .289 .152 1.906 .057

11 Age .054 .026 2.075 .038

10

12

13 Tenure −.092 .045 -2.050 .040

14

15 WE(*b*) .779 .066 11.775 .000

For Peer Review

16

17 CS −.093 .060 −1.551 .121

18

19 Index of moderated moderated mediation

20

21 index *Estimate S.E. T value P value*

22

23 *a7b* .096 .034 2.849 .004

24

25 Index of conditional moderated mediation

26

27 values of CSE *Estimate S.E. T value P value*

28

29 mean-2SD −.137 .105 −1.306 .191

30 mean-1SD .022 .065 .342 .732

31

32 mean .182 .062 2.951 .003

33

34 mean+1SD .341 .098 3.472 .001

35

36 mean+2SD .501 .148 3.388 .001

37

38 Note: N = 226; S.E. = standard error; DV = dependent variable; Gender: male = 1, female = 2;

39

40 WE = work engagement; CS = challenge stressor; POS = perceived organisational support; CSE

41 = core self-evaluations; AC = affective commitment; SD = standard deviation.

42

43

44

45 **Discussion**

46

47

48 Our study tested the assumption that the indirect effect of challenge stressors on affective

49

1. commitment through work engagement was jointly moderated by POS and CSE, based on a
2. sample of 226 public servants in China. The significant moderated moderated mediation effect

52

53 adds new and interesting theoretical and practical implications to the literature.

54

55

1 MODERATED MODERATED MEDIATION EFFECT 21

2

3

### 4 Theoretical implications

5

6 This analysis has sought to respond to recent calls for a differentiated job demands-resources

7

8 model (Crawford et al., 2010) that can predict work engagement by distinguishing challenge

9

10 stressors from hindrance stressors, consistent with the notion that all stressors are not created

11

1. equal. Our findings show that work engagement mediates the effect of challenge stressor on
2. affective commitment. This result suggests that public servants who are immersed in their work

14

15 and who display heightened affective commitment appraise challenge stressors as situations with

For Peer Review

16

17 potential to promote mastery, personal growth or future gains. This finding is consistent with the

18

19 transactional theory of stress (Lazarus & Folkman, 1984), in which the individual’s cognitive

20

21 appraisal of the situation is essential. This study is a first attempt at understanding the nature of

22

1. the mechanism by which challenge stressors are related to positive outcomes, an issue that
2. Cavanaugh et al. (2000) did not address. Following Min et al. (2015) contention that the

25

26 challenge-hindrance stressor model overlooks individual characteristics, we introduced a

27

1. personal factor assessed in terms of CSE. This step is also supported by the work of Noor (1995,

29

1. p. 268), who explained that “the inconsistent finding regarding the moderating effect of social

31

32 support is too simplistic to capture the presence of more complex relationships between existing

33

1. Variables”, implying the necessity of introducing individual differences into the model. From a
2. person-situation interactionist perspective, we have tested a moderated moderation model in

36

37 which the effect of challenge stressors on work engagement is jointly moderated by POS (a

38

39 situational factor) and CSE (a personal factor). A significant two-way interaction effect between

40

41 challenge stressors and POS means that high POS augments the effect of challenge stressors on

42

43 work engagement. A significant three-way interaction effect was found in which both POS and

44

1. CSE moderated the relationship between challenge stressors and work engagement. Overall, the
2. impact of challenge stressors on work engagement is very salient in situations with high POS and

47

48 high CSE. This result is in line with a person-situation interactionist perspective. The significant

49

50 three-way interaction effect supports the premise that the presence of both POS and CSE is a sine

51

52 qua non for the enhancement of public servants’ work engagement. In addition, this research

53

54 sheds light on our newly integrated model in which the moderation of the indirect effect of

55

56 challenge stressors by POS is dependent upon CSE. In other words, the results of our moderated

1 MODERATED MODERATED MEDIATION EFFECT 22

2

3

4 moderated mediation model suggest that the indirect effect of a challenge stressor is not equal for

5

1. all public servants, but is differentially affected by public servants’ differing levels of POS and
2. CSE. These findings help underscore the importance of treating both POS and CSE as moderators

8

9 in exploring the indirect effect of challenge stressors on affective commitment via work

10

11 engagement among public servants. The above conclusion not only helps researchers to understand the

mechanism of the effect of challenge stressor on affective commitment in the Chinese context, but also

shows that the process of challenge stressor producing positive effects is complicated. This deepens the

research on challenge stressor and [responds](http://www.baidu.com/link?url=2QPIR5ea9SDiHL1VrA4SqNSHgTbl0Dpt6bI4WbPGrAt6n5hUw0ZIX-VhDtx907EF7BcFF994scH7CPZrFtTPSPV7lsSwK-4q_s31VwEpxFO" \t "_blank) to the question on whether the challenge stressor can bring

positive effects(Mazzola ＆ Disselhorst, 2019).

### 14

### Practical implications

15

16

For Peer Review

1. Public organizations should implement human resources practices that increase perceptions of
2. organizational support among public servants by providing financial aid, paid leave and

19

20 educational programs (Zacher & Winter, 2011). Since CSE accelerates the extent to which the

21

22 indirect effect of challenge stressors on affective commitment via work engagement is moderated

23

24 by POS, managers of public organizations considering interventions to enhance work

25

26 engagement and affective commitment by increasing organizational support should also consider

27

1. the CSEs of public servants. The results of our study suggest that managers should be cautious in
2. implementing intervention strategies, because POS can make a situation more stressful for public

30

31 servants with low CSE, at least in the short term. Providing organizational support may be a

32

33 “situation of short-term pain for long-term gain” (Stetz et al., 2006, p. 55). High-CSE public

34

35 servants believe in their capabilities, worth and ability to control their lives. They therefore tend

36

37 to view situations (e.g. POS) more positively than low-CSE individuals do. This perspective can

38

1. help strengthen the moderating effect of POS between challenge stressors and work engagement
2. for high-CSE individuals. Thus the presence of individuals with high CSEs is essential in

41

42 public-service sectors.

43

44 One practical way forward for managers is to consider CSE as part of a set of criteria for

45

46 recruiting public servants. In other words, public organizations should select candidates who

47

48 already possess high-CSE traits (Harris, Harvey, & Kacmar, 2009; Jiang & Gu, 2015; Kittinger,

49

1. Walker, Cope, & Wuensch, 2009; Lee & Ok, 2015; Liang & Gong, 2013). Srivastava, John,
2. Gosling, & Potter (2003) have referred to the soft plaster hypothesis, by which they mean that

52

53 “personality is like plaster that has not fully hardened”, that is, that individuals’ personality traits

54

55 can change during their employment. Likewise, although CSE is a fairly stable trait, its stability

1 MODERATED MODERATED MEDIATION EFFECT 23

2

3

4 appears to be somewhat lower than previously believed, and not entirely resistant to change

5

1. (Judge, Bono, & Locke, 2000). Against the backdrop of these empirical results, managers should
2. facilitate public servants’ learning in ways that contribute to developing their CSE. In particular,

8

9 considering the deleterious effect of POS on public servants with low CSE, managers can assign

10

11 skilled mentors and provide training and counselling to strengthen these employees’ CSE.

12

13

### 14 Limitations and future research

15

16

For Peer Review

1. Despite the theoretical and practical implications of our findings, this study has certain
2. limitations, which should be addressed in future research. Firstly, since the results of the present

19

20 study were obtained using self-reported questionnaires, there is the possibility of CMB

21

22 (Podsakoff et al., 2003). However, according to Evans (1985), CMB reduces the chance of

23

24 detecting a significant interaction, since the effect of such a bias is to inflate the main effects at

25

26 the cost of failing to detect interaction effects. CMB cannot create artificial interactions; rather, it

27

1. often attenuates true interactions. Thus CMB is not a major threat as long as significant
2. interactions have been found (Bowling, Wang, & Li, 2012; De Jonge, Mulder, & Nijhuis, 1999;

30

31 Jung & Takeuchi, 2014; Wall, Jackson, Mullarkey, & Parker, 1996). Secondly, the current study

32

33 used a cross-sectional design; accordingly, we cannot assess real causal relationships. Future

34

35 research using more rigorous research designs, such as longitudinal or experimental designs, will

36

37 be needed to facilitate causal inferences. A final suggestion for future research is to explore other

38

1. variables that may moderate the relationship between challenge stressors and work engagement.
2. Some variables that may serve as moderators include emotional intelligence (Gao, Shi, Niu, &

41

42 Wang, 2013), transformational leadership (Kim, Liden, C., & Kim, 2015) and proactive

43

44 personality (Li, Zhong, Chen, Xie, & Mao, 2014). Despite these limitations, our findings provide

45

46 evidence of the importance of POS and CSE, as the indirect effect of challenge stressors hinges

47

48 upon these two moderators.

49

50

51 **Conclusion**

52

53

54 Based on a sample of 226 Chinese public servants, we have tested a moderated moderated

55

1 MODERATED MODERATED MEDIATION EFFECT 24

2

3

4 mediation model in which the indirect effect of challenge stressors on affective commitment

5

1. through work engagement is jointly moderated by POS and CSE. Our findings reveal that the
2. indirect effect is at its highest when both POS and CSE are high and at its lowest when both POS

8

9 and CSE are low. This study also highlights the importance of distinguishing between challenge

10

11 and hindrance stressors, since not all stressors are equally bad and not all lead to a reduction in

12

13 work engagement and affective commitment. The central message that emerges from these

14

15 findings is that public organizations should foster a supportive workplace culture and consider

16

For Peer Review

1. the CSEs of public servants as they strive to enhance work engagement and affective
2. commitment to the organization. Hopefully these findings will provide new insights and lead to

19

20 future research that will explore strategies to improve employee attitudes and job performance.

21

22

23

24 **References**

25

26

27 Abraham, R. (1998). Emotional dissonance in organizations: Antecedents, consequences, and

28

1. moderators. *Genetic, Social, and General Psychology Monographs*, *124*(2)*,* 229–246.
2. Allen, N. J., & Meyer, J. P. (1990). The measurement and antecedents of affective, continuance

31

32 and normative commitment to the organization. *Journal of Occupational Psychology*, *63*(1),

33

34 1–18.

35 Bakker, A. B., Emmerik, H., & Euwema, M. C. (2006). Crossover of burnout and engagement in

36

37 work teams. *Work and Occupations*, *33*(4), 464–489.

38

1. Beehr, T. A., Glaser, K. M., Canali, K. G., & Wallwey, D. A. (2001). Back to basics:
2. Re-examination of Demand-Control Theory of occupational stress. *Work and Stress*, *15*(2),

41

42 115–130.

43

1. Bowling, N. A., Wang, Q., & Li, H. Y. (2012). The moderating effect of core self-evaluations on
2. the relationships between job attitudes and organisational citizenship behavior. *Applied*

46

47 *Psychology*, *61*(1), 97–113.

48

1. Brunetto, Y., Teo, S. T. T., Shacklock, K., & Farr-Wharton, R. (2012). Emotional intelligence,
2. job satisfaction, well-being and engagement: Explaining organizational commitment and

51

52 turnover intentions in policing. *Human Resource Management Journal*, *22*(4), 428–441.

53

1. Camacho, S., Hassanein, K., & Head, M. (2018). Cyberbullying impacts on victims’ satisfaction
2. with information and communication technologies: The role of Perceived Cyberbullying

1 MODERATED MODERATED MEDIATION EFFECT 25

2

3

1. Severity. *Information and Management*, *55*(4), 494–507.
2. Casper, W. J., Harris, C., Taylor-Bianco, A., & Wayne, J. H. (2011). Work-family conflict,

6

7 perceived supervisor support and organizational commitment among Brazilian

8

1. professionals. *Journal of Vocational Behavior*, *79*(3), 640–652.
2. Cavanaugh, M. A., Boswell, W. R., Roehling, M. V., & Boudreau, J. W. (2000). An empirical

11

12 examination of self-reported work stress among U.S. managers. *Journal of Applied*

13

14 *Psychology*, *85*(1), 65–74.

15 Chen, S.-Y., & Scannapieco, M. (2010). The influence of job satisfaction on child welfare

For Peer Review

16

17 worker’s desire to stay: An examination of the interaction effect of self-efficacy and

18

1. supportive supervision. *Children and Youth Services Review*, *32*(4), 482–486.
2. Cheung, G. W., & Lau, R. S. (2017). Accuracy of parameter estimates and confidence intervals

21

22 in moderated mediation models: A comparison of regression and latent moderated structural

23

1. equations. *Organizational Research Methods*, *20*(4), 746-769.
2. Christian, M. S., Garza, A. S., & Slaughter, J. E. (2011). Work engagement: A quantitative

26

27 review and test of its relations with task and contextual performance. *Personnel Psychology*,

28

29 *64*(1), 89–136.

30 Cole, M. S., Walter, F., Bedeian, A. G., & O’Boyle, E. H. (2012). Job burnout and employee

31

32 engagement. *Journal of Management*, *38*(5), 1550–1581.

33

1. Craighead, C. W., Ketchen, D. J., Dunn, K. S., & Hult, G. T. M. (2011). Addressing common
2. method variance: Guidelines for survey research on information technology, operations, and

36

37 supply chain management. *IEEE Transactions on Engineering Management*, *58*(3), 578–

38

39 588.

40 Crawford, E. R., Lepine, J. A., & Rich, B. L. (2010). Linking job demands and resources to

41

42 employee engagement and burnout: A theoretical extension and meta-analytic test. *Journal*

43

1. *of Applied Psychology*, *95*(5), 834–848.
2. De Jonge, J., Mulder, M. J. G. P., & Nijhuis, F. J. N. (1999). The incorporation of different

46

47 demand concepts in the job demand-control model: Effects on health care professionals.

48

1. *Social Science and Medicine*, *48*(9), 1149–1160.
2. De Simone, S., Cicotto, G., Pinna, R., & Giustiniano, L. (2016). Engaging public servants:

51

52 Public service motivation, work engagement and work-related stress. *Management*

53

54 *Decision*, *54*(7), 1569–1594.

55 Demerouti, E., Bakker, A. B., Nachreiner, F., & Schaufeli, W. B. (2001). The job

1 MODERATED MODERATED MEDIATION EFFECT 26

2

3

1. demands-resources model of burnout. *Journal of Applied Psychology*, *86*(3), 499–512.
2. Eisenberger, R., Armeli, S., Rexwinkel, B., Lynch, P. D., & Rhoades, L. (2001). Reciprocation

6

7 of perceived organizational support. *Journal of Applied Psychology*, *86*(1), 42–51.

8

1. Evans, M. G. (1985). A Monte Carlo study of the effects of correlated method variance in
2. moderated multiple regression analysis. *Organizational Behavior and Human Decision*

11

12 *Processes*, *36*(3), 305–323.

13

1. Fornell, C., & Larcker, D. F. (1981). Evaluating structural equation models with unobservable
2. variables and measurement error. *Journal of Marketing Research*, *18*(1), 39–50.

For Peer Review

16

17 Gao, Y., Shi, J., Niu, Q., & Wang, L. (2013). Work-family conflict and job satisfaction:

18

1. Emotional intelligence as a moderator. *Stress and Health*, *29*(3), 222–228.
2. González-Morales, M. G., & Neves, P. (2015). When stressors make you work: Mechanisms

21

22 linking challenge stressors to performance. *Work and Stress*, *29*(3), 213–229.

23

1. Hakanen, J. J., Bakker, A. B., & Schaufeli, W. B. (2006). Burnout and work engagement among
2. teachers. *Journal of School Psychology*, *43*(6), 495–513.

26

27 Hakanen, J. J., Schaufeli, W. B., & Ahola, K. (2008). The job demands-resources model: A

28

29 three-year cross-lagged study of burnout, depression, commitment, and work engagement.

30 *Work and Stress*, *22*(3), 224–241.

31

32 Hallberg, U. E., & Schaufeli, W. B. (2006). ‘Same Same’ but different? *European Psychologist*,

33

34 *11*(2), 119–127.

35 Hargrove, M. B., Nelson, D. L., & Cooper, C. L. (2013). Generating eustress by challenging

36

37 employees. *Organizational Dynamics*, *42*(1), 61–69.

38

1. Harris, K. J., Harvey, P., & Kacmar, K. M. (2009). Do social stressors impact everyone equally?
2. An examination of the moderating impact of core self-evaluations. *Journal of Business and*

41

42 *Psychology*, *24*(2), 153–164.

43

1. Hayes, A. F. (2013). *Introduction to mediation, moderation, and conditional process analysis*.
2. New York: Guilford Press.

46

47 Hayes, A. F. (2015). An index and test of linear moderated mediation. *Multivariate Behavioral*

48

49 *Research*, *50*(1), 1–22.

50 Hayes, A. F. (2018). Partial, conditional, and moderated moderated mediation: Quantification,

51

52 inference, and interpretation. *Communication Monographs*, *85*(1), 4–40.

53

1. Hu, Q., Schaufeli, W. B., & Taris, T. W. (2011). The job demands-resources model: An analysis
2. of additive and joint effects of demands and resources. *Journal of Vocational Behavior*,

1 MODERATED MODERATED MEDIATION EFFECT 27

2

3

4 *79*(1), 181–190.

5 Inoue, A., Kawakami, N., Tsuno, K., Shimazu, A., Tomioka, K., & Nakanishi, M. (2013). Job

6

7 demands, job resources, and work engagement of Japanese employee: A prospective cohort

8

1. study. *International Archives of Occupational and Environmental Health*, *86*(4), 441–449.
2. Inoue, A., Kawakami, N., Tsutsumi, A., Shimazu, A., Miyaki, K., Takahashi, M.···, &

11

12 Totsuzaki, T. (2014). Association of job demands with work engagement of Japanese

13

14 employees: Comparison of challenges with hindrances (J-HOPE). *PLOS ONE*, *9*(3),

15 e91583.

For Peer Review

16

17 Jiang, W., & Gu, Q. (2015). A moderated mediation examination of proactive personality on

18

1. employee creativity. *Journal of Organizational Change Management*, *28*(3), 393–410.
2. Judge, T. A., Bono, J. E., & Locke, E. A. (2000). Personality and job satisfaction: The

21

22 moderating role of job characteristics. *Journal of Applied Psychology*, *85*(2), 237–249.

23

1. Judge, T. A., Erez, A., Bono, J. E., & Thoresen, C. J. (2003). The Core self-evaluations scale:
2. Development of a measure. *Personnel Psychology*, *56*(2), 303–331.

26

27 Jung, H. S., & Yoon, H. H. (2016). What does work meaning to hospitality employees? The

28

1. effects of meaningful work on employees’ organizational commitment: The mediating role
2. of job engagement. *International Journal of Hospitality Management*, *53*(10), 59–68.

31

32 Jung, Y., & Takeuchi, N. (2014). Relationships among leader-member exchange,

33

1. person-organization fit and work attitudes in Japanese and Korean organizations: Testing a
2. cross-cultural moderating effect. *The International Journal of Human Resource*

36

37 *Management*, *25*(1), 23–46.

38

1. Karatepe, O. M. (2011). Procedural justice, work engagement, and job outcomes: Evidence from
2. Nigeria. *Journal of Hospitality Marketing and Management*, *20*(8), 855–878.

41

42 Karatepe, O. M., & Aga, M. (2012). Work engagement as a mediator of the effects of personality

43

44 traits on job outcomes: A study of frontline employees. *Services Marketing Quarterly*,

45 *33*(4), 343–362.

46

47 Karatepe, O. M., Beirami, E., Bouzari, M., & Safavi, H. P. (2014). Does work engagement

48

1. mediate the effects of challenge stressors on the job outcomes? Evidence from the hotel
2. industry. *International Journal of Hospitality Management*, *36*(1), 14–22.

51

52 Kickul, J., & Posig, M. (2001). Supervisory emotional support and burnout: An explanation of

53

1. reverse buffering effects. *Journal of Managerial Issues*, *13*(3), 328–342.
2. Kim, T., Liden, R. C., Kim, S., & Lee, D. (2015). The interplay between follower core

1 MODERATED MODERATED MEDIATION EFFECT 28

2

3

1. self-evaluation and transformational leadership: Effects on employee outcomes. *Journal of*
2. *Business and Psychology*, *30*(2), 345–355.

6

7 Kittinger, J. D., Walker, A. G., Cope, J. G., & Wuensch, K. L. (2009). The relationship between

8

9 core self-evaluations and affective commitment. *Journal of Behavioral and Applied*

10 *Management*, *11*(1), 68–92.

11

12 Klein, A., & Moosbrugger, H. (2000). Maximum likelihood estimation of latent interaction

13

1. effects with the LMS method. *Psychometrika*, *65*(4), 457–474.
2. Kline, R. B. (2016). *Principles and practice of structural equation modeling* (4th ed). New York:

For Peer Review

16

17 Guilford Press.

18

1. Kong, F., Zhao, J., & You, X. (2013). Self-esteem as mediator and moderator of the relationship
2. between social support and subjective well-being among Chinese University Students.

21

22 *Social Indicators Research*, *112*(1), 151–161.

23

1. Lazarus, R. S., & Folkman, S. (1984). *Stress, appraisal and coping*. New York: Springer.
2. Lee, J. H., & Ok, C. (2015). Drivers of work engagement: An examination of core

26

27 self-evaluations and psychological climate among hotel employees. *International Journal of*

28

1. *Hospitality Management*, *44*, 84–98.
2. Lepine, J. A., Podsakoff, N. P., & Lepine, M. A. (2005). A meta-analytic test of the challenge

31

32 stressor–hindrance stressor framework: An explanation for inconsistent relationships among

33

1. stressors and performance. *Academy of Management Journal*, *48*(5), 764–775.
2. Li, L., Zhong, J., Chen, Y., Xie, Y., & Mao, S. (2014). Moderating effects of proactive

36

37 personality on factors influencing work engagement based on the job demands-resources

38

1. model. *Social Behavior and Personality*, *42*(1), 7–15.
2. Liang, J., & Gong, Y. (2013). Capitalizing on proactivity for informal mentoring received during

41

42 early career: The moderating role of core self-evaluations. *Journal of Organizational*

43

44 *Behavior*, *34*(8), 1182–1201.

45 Liao, F., Yang, L., Wang, M., Drown, D., & Shi, J. (2013). Team–member exchange and work

46

47 engagement: Does personality make a difference? *Journal of Business and Psychology*,

48

49 *28*(1), 63–77.

50 Lin, M., & Ling, Q. (2018). Is role stress always harmful? Differenriating role overload and role

51

52 ambiguity in the challenge-hindrance stressors framework. *Tourism Management*, *68*, 355–

53

54 366.

55 Liu, B., Tang, T. L., & Yang, K. (2015). When does public service motivation fuel the job

1 MODERATED MODERATED MEDIATION EFFECT 29

2

3

1. satisfaction fire? The joint moderation of person–organization fit and needs–supplies fit.
2. *Public Management Review*, *17*(6), 876–900.

6

7 Liu, B., Yang, K., & Ju, W. (2014). Work-related stressors and health-related outcomes in public

8

9 service: Examining the role of public service motivation. *American Review of Public*

10 *Administration*, *45*(6), 653–673.

11

12 Macey, W. H., & Schneider, B. (2008). The meaning of employee engagement. *Industrial and*

13

1. *Organizational Psychology*, *1*(1), 3–30.
2. Marques, A. M., Chambel, M. J., & Pinto, I. (2015). The exchange relationship between

For Peer Review

16

17 work-family enrichment and affective commitment: The moderating role of gender. *Spanish*

18

1. *Journal of Psychology*, *18*, (e35), 1-11.
2. Marsh, H. W., Wen, Z., & Hau, K. T. (2004). Structural equation models of latent interactions:

21

22 Evaluation of alternative estimation strategies and indicator construction. *Psychological*

23

24 *Methods*, *9*(3), 275–300.

25 Mauno, S., Kinnunen, U., & Ruokolainen, M. (2007). Job demands and resources as antecedents

26

27 of work engagement: A longitudinal study. *Journal of Vocational Behavior*, *70*(1), 149–

28

29 171.

30  Mazzola, J. J., & Disselhorst R. (2019). Should we be “challenging” employees?: A critical review and meta- analysis of the challenge-hindrance model of stress. *Journal of Organizational Behavior, 2019*(3), 949- 961.

Min, H., Kim, H. J., & Lee, S. (2015). Extending the challenge-hindrance stressor framework:

31

32 The role of psychological capital. *International Journal of Hospitality Management*, *50*(1),

33

34 105–114.

35 Nahrgang, J. D., Morgeson, F. P., & Hofmann, D. A. (2011). Safety at work: A meta-analytic

36

37 investigation of the link between job demands, job resources, burnout, engagement, and

38

1. safety outcomes. *Journal of Applied Psychology, 96*(1), 71-94.
2. Noor, N. M. (1995). Job-role quality and women’s psychological well-being: Locus of control

41

42 and social support as moderators. *Journal of Community and Applied Social Psychology*,

43

44 *5*(4), 259–272.

45 Pearsall, M. J., Ellis, A. P. J., & Stein, J. H. (2009). Coping with challenge and hindrance

46

47 stressors in teams: Behavioral, cognitive, and affective outcomes. *Organizational Behavior*

48

1. *and Human Decision Processes*, *109*(1), 18–28.
2. Podsakoff, N. P., Lepine, J. A., & Lepine, M. A. (2007). Differential challenge

51

52 stressor-hindrance stressor relationships with job attitudes, turnover intentions, and

53

1. withdrawal behavior : A meta-analysis. *Journal of Applied Psychology*, *92*(2), 438–454.
2. Podsakoff, P. M., MacKenzie, S. B., Lee, J. Y., & Podsakoff, N. P. (2003). Common method

1 MODERATED MODERATED MEDIATION EFFECT 30

2

3

1. biases in behavioral research: A critical review of the literature and recommended remedies.
2. *Journal of Applied Psychology*, *88*(5), 879–903.

6

7 Podsakoff, P. M., MacKenzie, S. B., & Podsakoff, N. P. (2012). Sources of method bias in social

8

9 science research and recommendations on how to control it. *Annual Review of Psychology*,

10 *63*(1), 539–569.

11

12 Pomaki, G., DeLongis, A., Frey, D., Short, K., & Woehrle, T. (2010). When the going gets

13

1. tough: Direct, buffering and indirect effects of social support on turnover intention.
2. *Teaching and Teacher Education*, *26*(6), 1340–1346.

For Peer Review

16

17 Rhoades, L., & Eisenberger, R. (2002). Perceived organizational support: A review of the

18

1. literature. *Journal of Applied Psychology*, *87*(4), 698–714.
2. Rich, B. L., Lepine, J. A., & Crawford, E. R. (2010). Job engagement: Antecedents and effects

21

22 on job performance. *Academy of Management Journal*, *53*(3), 617–635.

23

1. Ruiz-Palomino, P., & Linuesa-Langreo, J. (2018). Implications of person-situation interactions
2. for Machiavellians’ unethical tendencies: The buffering role of managerial ethical

26

27 leadership. *European Management Journal*, *36*(2), 243–253.

28

1. Schaufeli, W. B., & Bakker, A. B. (2004). Job demands, job resources, and their relationship
2. with burnout and engagement: A multi-sample study. *Journal of Organizational Behavior*,

31

32 *25*(3), 293–315.

33

1. Schaufeli, W. B., Bakker, A. B., & Salanova, M. (2006). The measurement of work engagement
2. with a short questionnaire. *Educational and Psychological Measurement*, *66*(4), 701–716.

36

37 Schaufeli, W. B., Salanova, M., González-Romá, V., & Bakker, A. B. (2002). The measurement

38

1. of engagement and burnout: A two sample confirmatory factor analytic approach. *Journal*
2. *of Happiness Studies*, *3*(1), 71–92.

41

42 Scrima, F., Lorito, L., Parry, G., & Falgares, G. (2014). The mediating role of work engagement

43

44 involvement and affective commitment. *The International Journal of Human Resource*

45 *Management*, *25*(15), 2159–2173.

46

47 Selvarajan, T. T., Singh, B., & Cloninger, P. A. (2016). Role of personality and affect on the

48

49 social support and work family conflict relationship. *Journal of Vocational Behavior*, *94*,

50 39–56.

51

52 Simon, C. A., & Nice, D. C. (1997). Stoicism. *American Review of Public Administration*, *27*(2),

53

54 168–180.

55 Srivastava, S., John, O. P., Gosling, S. D., & Potter, J. (2003). Development of personality in

1 MODERATED MODERATED MEDIATION EFFECT 31

2

3

1. early and middle adulthood: Set like plaster or persistent change? *Journal of Personality*
2. *and Social Psychology*, *84*(5), 1041–1053.

6

7 Stamper, C. L., & Johlke, M. C. (2003). The impact of perceived organizational support on the

8

9 relationship between boundary spanner role stress and work outcomes. *Journal of*

10 *Management*, *29*(4), 569–588.

11

12 Stetz, T. A., Stetz, M. C., & Bliese, P. D. (2006). The importance of self-efficacy in the

13

14 moderating effects of social support on stressor-strain relationships. *Work and Stress*, *20*(1),

15 49–59.

For Peer Review

16

17 Taipale, S., Selander, K., Anttila, T., & Nätti, J. (2011). Work engagement in eight European

18

1. countries. *International Journal of Sociology and Social Policy*, *31*(7/8), 486–504.
2. Teng, F., & Chen, Z. (2012). Does social support reduce distress caused by ostracism? It depends

21

22 on the level of one’s self-esteem. *Journal of Experimental Social Psychology*, *48*(5), 1192–

23

24 1195.

25 Tett, R. P., & Burnett, D. D. (2003). A personality trait-based interactionist model of job

26

27 performance. *Journal of Applied Psychology*, *88*(3), 500–517.

28

1. Van Dyne, L., & Pierce, J. L. (2004). Psychological ownership and feelings of possession: Three
2. field studies predicting employee attitudes and organizational citizenship behavior. *Journal*

31

32 *of Organizational Behavior, 25*(4), 439-459.

33

1. Voils, C. I., Steffens, D. C., Flint, E. P., & Bosworth, H. B. (2005). Social support and locus of
2. control as predictors of adherence to antidepressant medication in an elderly population.

36

37 *American Journal of Geriatric Psychiatry*, *13*(2), 157–165.

38

1. Wall, T. D., Jackson, P. R., Mullarkey, S., & Parker, S. K. (1996). The demand-control model of
2. job strain: A more specific test. *Journal of Occupational and Organizational Psychology*,

41

42 *69*(2), 153–166.

43

1. Wallace, J. E. (2005). Job stress, depression and work-to-family conflict: A test of the strain and
2. buffer hypotheses. *Industrial Relations*, *60*(3), 510–539.

46

47 Wang, J., & Wang, X. (2012). *Structural equation modeling: Applications using Mplus*. West

48

1. Sussex, UK: Higher Education Press.
2. Webster, J. R., Beehr, T. A., & Love, K. (2011). Extending the challenge-hindrance model of

51

52 occupational stress: The role of appraisal. *Journal of Vocational Behavior*, *79*(2), 505–516.

53

1. West, J. P., & West, C. M. (1989). Job Stress and public sector occupations. *Review of Public*
2. *Personnel Administration*, *9*(3), 46–65.

1 MODERATED MODERATED MEDIATION EFFECT 32

2

3

1. Widmer, P. S., Semmer, N. K., Kälin, W., Jacobshagen, N., & Meier, L. L. (2012). The
2. ambivalence of challenge stressors: Time pressure associated with both negative and

6

7 positive well-being. *Journal of Vocational Behavior*, *80*(2), 422–433.

8

1. Williams, L. J., Cote, J. A., & Buckley, M. R. (1989). Lack of method variance in self-reported
2. affect and perceptions at work: Reality or artifact? *Journal of Applied Psychology*, *74*(3),

11

12 462–468.

13

1. Witt, L. A., & Carlson, D. S. (2006). The work-family interface and job performance:
2. Moderating effects of conscientiousness and perceived organizational support. *Journal of*

For Peer Review

16

17 *Occupational Health Psychology*, *11*(4), 343–357.

18

1. Zacher, H., & Winter, G. (2011). Eldercare demands, strain, and work engagement: The
2. moderating role of perceived organizational support. *Journal of Vocational Behavior*, *79*(3),

21

22 667–680.

23

24

25

26

27

28

29

30

31

32

33

34

35

36

37

38

39

40

41

42

43

44

45

46

47

48

49

50

51

52

53

54

55
